# Supplementary material for: A New Approach for Understanding International Hospital Bed Numbers and Application to Local Area Bed Demand and Capacity Planning
Source: Preprints.org preprint supplement (doi:10.20944/preprints202405.1435.v1), 2024-05-22
Supplement: Supplementary file 1 [file supplementary]

**Supplementary Material**

**Table S1.** Available bed numbers, average occupancy, and lines of constant turn-away.

| **Beds** | **0.001% Turn-away** | **0.01% Turn-away** | **0.1% Turn-away** | **1% Turn-away** | **3% Turn-away** | **5% Turn-away** | **20% Turn-away** | **50% Turn-away** |
| --- | --- | --- | --- | --- | --- | --- | --- | --- |
| 1 | 0.0% | 0.0% | 0.1% | 1.0% | 3.0% | 5.0% | 20.0% | 50.0% |
| 2 | 0.2% | 0.7% | 2.5% | 7.5% | 13.6% | 17.9% | 40.0% | 68.3% |
| 3 | 1.3% | 2.9% | 6.3% | 15.2% | 23.1% | 28.3% | 51.5% | 76.5% |
| 4 | 3.2% | 5.9% | 11.0% | 21.6% | 30.5% | 35.8% | 59.0% | 81.3% |
| 5 | 5.0% | 9.0% | 15.2% | 27.0% | 36.4% | 41.9% | 64.2% | 84.4% |
| 6 | 7.8% | 12.1% | 19.2% | 31.6% | 41.0% | 46.5% | 68.1% | 86.7% |
| 7 | 10.4% | 15.0% | 22.6% | 35.5% | 44.9% | 50.4% | 71.2% | 88.6% |
| 8 | 12.5% | 17.8% | 25.6% | 38.9% | 48.3% | 53.5% | 73.7% | 89.4% |
| 9 | 15.0% | 20.3% | 28.4% | 41.7% | 51.1% | 56.3% | 75.7% | 90.6% |
| 10 | 17.2% | 22.6% | 30.9% | 44.2% | 53.6% | 59.1% | 77.5% | 91.4% |
| 11 | 18.7% | 24.7% | 33.2% | 46.6% | 55.7% | 60.7% | 79.3% | 92.3% |
| 12 | 20.6% | 26.8% | 35.3% | 48.7% | 57.6% | 62.5% | 80.0% | 92.5% |
| 13 | 22.7% | 28.5% | 37.2% | 50.5% | 59.3% | 64.1% | 81.2% | 93.1% |
| 14 | 24.2% | 30.3% | 38.9% | 52.2% | 60.8% | 65.6% | 82.3% | 93.6% |
| 15 | 25.5% | 31.9% | 40.5% | 53.5% | 62.4% | 67.3% | 83.2% | 94.0% |
| 16 | 26.8% | 33.4% | 42.0% | 55.1% | 63.5% | 68.0% | 84.0% | 94.4% |
| 17 | 28.1% | 34.8% | 43.4% | 56.4% | 64.9% | 69.1% | 84.7% | 94.7% |
| 18 | 29.5% | 36.1% | 44.7% | 57.6% | 65.6% | 70.1% | 85.3% | 95.0% |
| 19 | 30.8% | 37.3% | 45.9% | 58.7% | 66.7% | 71.1% | 85.9% | 95.3% |
| 20 | 32.1% | 38.5% | 47.0% | 59.6% | 67.9% | 72.4% | 86.5% | 95.4% |
| 21 | 33.1% | 39.6% | 48.1% | 60.7% | 68.7% | 72.7% | 86.9% | 95.7% |
| 22 | 34.1% | 40.7% | 49.1% | 61.6% | 69.5% | 73.5% | 87.6% | 95.7% |
| 23 | 35.2% | 41.7% | 50.1% | 62.5% | 70.3% | 74.2% | 88.0% | 95.9% |
| 24 | 36.2% | 42.5% | 51.0% | 63.3% | 71.0% | 74.8% | 88.3% | 96.0% |
| 25 | 37.2% | 43.5% | 51.8% | 63.9% | 71.7% | 75.9% | 88.7% | 96.3% |
| 26 | 38.0% | 44.2% | 52.7% | 64.8% | 72.2% | 76.0% | 88.9% | 96.3% |
| 27 | 38.8% | 45.2% | 53.5% | 65.5% | 72.8% | 76.5% | 89.5% | 96.5% |
| 28 | 39.6% | 46.1% | 54.2% | 66.1% | 73.3% | 77.1% | 89.7% | 96.6% |
| 29 | 40.5% | 46.9% | 54.9% | 66.8% | 73.7% | 77.5% | 89.9% | 96.7% |
| 30 | 41.3% | 47.5% | 55.6% | 67.1% | 74.6% | 78.5% | 90.2% | 96.9% |
| 31 | 41.9% | 48.1% | 56.3% | 67.9% | 74.9% | 78.4% | 90.6% | 96.9% |
| 32 | 42.6% | 48.8% | 56.9% | 68.4% | 75.3% | 78.9% | 90.8% | 97.0% |
| 33 | 43.2% | 49.4% | 57.5% | 69.0% | 75.7% | 79.2% | 90.9% | 97.1% |
| 34 | 43.9% | 50.0% | 58.1% | 69.4% | 76.3% | 79.6% | 91.3% | 97.2% |
| 35 | 44.6% | 50.7% | 58.6% | 69.7% | 76.8% | 80.6% | 91.4% | 97.3% |
| 36 | 45.1% | 51.4% | 59.2% | 70.4% | 76.9% | 80.3% | 91.6% | 97.4% |
| 37 | 45.7% | 51.9% | 59.7% | 70.8% | 77.4% | 80.7% | 91.7% | 97.4% |
| 38 | 46.3% | 52.4% | 60.2% | 71.2% | 77.7% | 81.0% | 92.0% | 97.5% |
| 39 | 46.9% | 52.8% | 60.6% | 71.7% | 78.2% | 81.3% | 92.1% | 97.6% |
| 40 | 47.5% | 53.4% | 61.1% | 71.8% | 78.5% | 82.2% | 92.3% | 97.6% |
| 41 | 48.0% | 53.8% | 61.6% | 72.4% | 78.8% | 82.5% | 92.5% | 97.7% |
| 42 | 48.6% | 54.2% | 62.0% | 72.8% | 79.0% | 82.7% | 92.6% | 97.7% |
| 43 | 49.1% | 54.8% | 62.4% | 73.1% | 79.4% | 83.0% | 92.8% | 97.8% |
| 44 | 49.6% | 55.2% | 62.8% | 73.5% | 79.6% | 83.2% | 92.9% | 97.8% |
| 45 | 50.1% | 55.7% | 63.2% | 73.8% | 80.0% | 83.5% | 93.0% | 97.9% |
| 46 |  | 56.0% | 63.6% | 74.1% | 80.2% | 83.7% | 93.2% | 97.9% |
| 47 |  | 56.5% | 64.0% | 74.4% | 80.5% | 84.0% | 93.3% | 98.0% |
| 48 |  | 56.8% | 64.3% | 74.7% | 80.6% | 84.2% | 93.3% | 98.0% |
| 49 |  | 57.3% | 64.7% | 75.0% | 81.0% | 84.4% | 93.6% | 98.1% |
| 50 |  | 57.7% | 64.8% | 75.3% | 81.1% | 84.6% | 93.6% | 98.1% |
| 51 |  | 58.0% | 65.1% | 75.6% | 81.4% | 84.8% | 93.6% | 98.1% |
| 52 |  | 58.4% | 65.4% | 75.8% | 81.7% | 85.0% | 93.8% | 98.1% |
| 53 |  | 58.8% | 65.7% | 76.1% | 81.8% | 85.2% | 93.9% | 98.2% |
| 54 |  | 59.0% | 66.0% | 76.3% | 82.1% | 85.4% | 94.1% | 98.2% |
| 55 |  | 59.4% | 66.3% | 76.6% | 82.2% | 85.5% | 94.1% | 98.2% |
| 60 |  | 60.9% | 67.7% | 77.7% | 83.2% | 86.4% | 94.5% | 98.4% |
| 65 |  | 62.4% | 69.0% | 78.7% | 84.0% | 87.1% | 94.9% | 98.5% |
| 66 |  | 62.7% | 69.2% | 78.9% | 84.2% | 87.2% | 94.9% | 98.5% |
| 67 |  | 62.9% | 69.4% | 79.1% | 84.3% | 87.4% | 95.0% | 98.6% |
| 70 |  | 63.6% | 70.1% | 79.6% | 84.7% | 87.8% | 95.2% | 98.6% |
| 72 |  | 64.1% | 70.5% | 80.0% | 84.9% | 88.0% | 95.3% | 98.6% |
| 75 |  | 64.7% | 71.1% | 80.4% | 85.4% | 88.3% | 95.5% | 98.7% |
| 80 |  | 65.8% | 72.0% | 81.2% | 86.0% | 88.8% | 95.7% | 98.7% |
| 85 |  | 66.8% | 72.8% | 81.8% | 86.5% | 89.3% | 96.0% | 98.8% |
| 90 |  | 67.6% | 73.6% | 82.4% | 87.0% | 89.7% | 96.2% | 98.8% |
| 95 |  | 68.5% | 74.3% | 83.0% | 87.4% | 90.1% | 96.3% | 98.9% |
| 100 |  | 69.2% | 74.9% | 83.5% | 87.9% | 90.5% | 96.5% | 99.0% |
| 105 |  | 70.4% | 75.6% | 84.0% | 88.2% | 91.0% | 96.6% | 99.0% |
| 110 |  | 70.6% | 76.1% | 84.4% | 88.6% | 91.1% | 96.8% | 99.1% |
| 115 |  | 71.2% | 76.7% | 84.8% | 88.9% | 91.4% | 96.9% | 99.1% |
| 120 |  | 72.4% | 77.2% | 85.2% | 89.3% | 91.7% | 97.1% | 99.2% |
| 125 |  | 72.7% | 77.6% | 85.6% | 89.5% | 91.9% | 97.1% | 99.2% |
| 130 |  | 72.8% | 78.1% | 85.9% | 89.8% | 92.1% | 97.2% | 99.3% |
| 135 |  | 73.3% | 78.5% | 86.3% | 90.0% | 92.3% | 97.3% | 99.3% |
| 140 |  | 73.8% | 78.9% | 86.6% | 90.3% | 92.5% | 97.4% | 99.3% |
| 143 |  | 74.0% | 79.1% | 86.8% | 90.4% | 92.7% | 97.5% | 99.3% |
| 144 |  | 74.2% | 79.2% | 86.8% | 90.5% | 92.7% | 97.5% | 99.3% |
| 150 |  | 74.7% | 79.6% | 87.1% | 90.7% | 92.9% | 97.6% | 99.4% |
| 155 |  | 75.4% | 80.0% | 87.4% | 90.9% | 93.0% | 97.7% | 99.4% |
| 160 |  | 75.4% | 80.3% | 87.6% | 91.1% | 93.2% | 97.8% | 99.4% |
| 165 |  | 75.7% | 80.6% | 87.9% | 91.3% | 93.4% | 97.7% | 99.4% |
| 170 |  | 76.2% | 80.9% | 88.1% | 91.5% | 93.5% | 97.8% | 99.4% |
| 175 |  | 76.5% | 81.2% | 88.3% | 91.6% | 93.6% | 97.9% | 99.4% |
| 200 |  | 78.0% | 82.5% | 89.3% | 92.4% | 94.3% | 98.2% | 99.5% |
| 210 |  | 78.5% | 82.9% | 89.6% | 92.6% | 94.5% | 98.2% | 99.5% |
| 220 |  | 79.0% | 83.3% | 89.9% | 92.9% | 94.7% | 98.3% | 99.6% |
| 225 |  | 79.2% | 83.5% | 90.1% | 92.9% | 94.7% | 98.3% | 99.6% |
| 230 |  | 79.5% | 83.7% | 90.2% | 93.1% | 94.9% | 98.4% | 99.7% |
| 240 |  | 79.9% | 84.1% | 90.5% | 93.3% | 95.0% | 98.4% | 99.7% |
| 250 |  | 80.3% | 84.4% | 90.7% | 93.4% | 95.2% | 98.5% | 99.4% |
| 260 |  | 80.7% | 84.8% | 90.9% | 93.6% | 95.4% | 98.6% | 99.5% |
| 300 |  | 82.0% | 86.0% | 91.8% | 94.2% | 95.8% | 98.7% | 99.6% |
| 350 |  | 83.4% | 86.9% | 92.6% | 94.8% | 96.3% | 98.8% | 99.7% |
| 365 |  | 84.0% | 87.3% | 92.8% | 95.0% | 96.6% | 98.9% | 99.7% |
| 400 |  | 84.5% | 87.8% | 93.2% | 95.3% | 96.7% | 99.0% | 99.8% |
| 450 |  | 85.4% | 88.6% | 93.7% | 95.7% | 97.0% | 99.1% | 99.8% |
| 500 |  | 86.2% | 89.2% | 94.2% | 95.8% | 97.2% | 99.2% | 99.8% |
| 1000 |  | 90.4% | 92.6% | 96.5% | 97.5% | 98.4% | 99.4% | 99.9% |
| 1100 |  | 90.9% | 93.1% | 96.7% | 97.7% | 98.5% | 99.6% | 99.9% |

For a spreadsheet version of this table contact Dr Rodney Jones at hcaf_rod@yahoo.co.uk

**Figure S1.** Correlation between Clinical Commissioning Group avoidable ASMR versus matching all-cause ASMR for local authorities.

**Figure S1.** CCG avoidable ASMR versus Local Authority all-cause ASMR. Data from [4,5]. ASMR uses the European Standard Population.

In this correlation, CCG avoidable ASMR was first extrapolated to 2019 by linear regression of the avoidable ASMR between 2011 and 2019. This was then matched against the local authority ASMR in 2019. Some 46 CCGs had a matching local authority ASMR. See Figure S1.1. The correlation in Figure S1.1. was then used to estimate CCG all-cause ASMR where no matching local authority was available.
